# Supplementary material for: Contiguous United States wildland fire emission estimates during 2003–2015
Source: Copernicus journal article supplement (doi:10.5194/essd-2018-100), 2018-08-31
Supplement: Supplementary file 1 [file essd-2018-100-supplement.pdf]

## Supplement

### Available canopy fuel

Tree level available canopy fuel (ACF), the dry mass of canopy fuels likely to be consumed in a fully active crown fire (needles, lichen, moss, and live and dead branch wood  $\leq 6$  mm in diameter) (Scott and Reinhardt, 2001), was derived from FIA plot Treelist tables. FIA Treelist tables (which are named TREE in the FIA database) provide a detailed inventory of trees on FIA plots (O'Connell et al., 2017). FIA plots with Treelists are based on Phase 2 sampling, in which measurements are taken on the standard FIA base grid which has a density of approximately 1 sample location per 2428 ha (6000 acres) (Bechtold and Patterson, 2005). The Treelist table variables: species code (SPCD), diameter (D), crown class code (CCLCD), tree status (STATUSCD), and tree density (TPA) were used to estimate ACF associated with each Treelist table entry using empirical equations from the literature following the approach outlined in the FuelCalc User's Guide (Lutes, 2016); FuelCalc is a fuel management software system which can be used to calculate forest canopy characteristics at an inventory plot. The Treelist tables provide a detailed inventory of trees on FIA plots (O'Connell et al., 2017). For each FIA plot the Treelist tables were used to estimate ACF for each tree inventoried using the species specific equations listed in Table S1. The Treelist tables include a tree expansion factors (TPA) which are used to scale each tree on a plot to a per-area basis (O'Connell et al., 2017). The variables for the equations listed in Table S1 are defined in Table S2. The variable *reduc* in the equations of Table S1 was assigned from Table S3, the species crosswalk and crown condition, using SPCD and CCLCD variables from the TREE table. The TREE table variable STATUSCD was used to flag dead trees and set the value for *dead* (1 for live tree and 0 for dead trees). Following Scott and Reinhardt (2001), we assumed that only softwood species contributed to ACF and only softwood tree species were included in the ACF calculations. Softwood tree species from the TREE tables that were not among the 26 species included in Table S1 were assigned equations using the crosswalk from Table S3.

**Table S1.** Species specific equations used to calculate tree level available canopy fuel (ACF). See Table S2 for description of equation variables.

| Species Code<br>and Reference | Equations                                                                                                                                                                                   |
|-------------------------------|---------------------------------------------------------------------------------------------------------------------------------------------------------------------------------------------|
| PP<br>(Brown, 1978)           | $wt = \exp^{(0.268+2.704*\log(D))}$ $f = 0.558 * \exp^{(-0.0475*D)}$ $b = 0.625 * \exp^{(-0.0511*D)} - f$ $acf = wt * reduc * (dead * f + 0.5 * b)$                                         |
| GF<br>(Brown, 1978)           | $wt = \exp^{(1.3094+1.6076*\log(D))}$ $f = \frac{1}{1.592 + 0.0529 * D}$ $b = \frac{1}{1.15 + 0.0416 * D} - f$ $D > 36: f = 0.286, b = 0.378 - f$ $acf = wt * reduc * (dead * f + 0.5 * b)$ |
| DF<br>(Brown, 1978)           | $wt = \exp^{(1.368+1.5819*\log(D))}$ $f = 0.484 * \exp^{(-0.0210*D)}$ $b = 0.729 * \exp^{(-0.0233*D)} - f$ $acf = wt * reduc * (dead * f + 0.5 * b)$                                        |
| LP<br>(Brown, 1978)           | $wt = \exp^{(0.1224+1.8820*\log(D))}$ $f = 0.493 - 0.0117 * D$ $b = (0.777 - 0.0146 * D) - f$ $acf = wt * reduc * (dead * f + 0.5 * b)$                                                     |
| WL<br>(Brown, 1978)           | $wt = \exp^{(0.4373+1.6786*\log(D))}$ $f = 0.347 * \exp^{(-0.0434*D)}$ $b = 0.745 * \exp^{(-0.0362*D)} - f$ $acf = wt * reduc * (dead * f + 0.5 * b)$                                       |

SF  
(Brown, 1978)

$$\begin{aligned}wt &= 7.345 + 1.255 * D * D \\f &= 0.597 * \exp^{(-0.0425*D)} \\b &= 0.864 * \exp^{(-0.0373*D)} - f \\acf &= wt * reduc * (dead * f + 0.5 * b)\end{aligned}$$

WB  
(Brown, 1978)

$$\begin{aligned}wt &= 0.8371 * D * D \\f &= 0.512 * \exp^{(-0.0374*D)} \\b &= 0.864 * \exp^{(-0.0585*D)} - f \\acf &= wt * reduc * (dead * f + 0.5 * b)\end{aligned}$$

AL  
(Brown, 1978)

$$\begin{aligned}wt &= \exp^{(0.4373+1.6786*\log(D))} \\f &= 0.512 * \exp^{(-0.0374*D)} \\b &= 0.745 * \exp^{(-0.0362*D)} - f \\acf &= wt * reduc * (dead * f + 0.5 * b)\end{aligned}$$

WP  
(Brown, 1978)

$$\begin{aligned}wt &= \exp^{(0.7276+1.5497*\log(D))} \\f &= 0.550 * \exp^{(-0.0345*D)} \\0.914 - 0.0978 * \text{sqrt}(D) - f \\acf &= wt * reduc * (dead * f + 0.5 * b)\end{aligned}$$

WC  
(Brown, 1978)

$$\begin{aligned}wt &= \exp^{(0.8815+1.6389*\log(D))} \\f &= 0.617 * \exp^{(-0.0233*D)} \\b &= 0.756 * \exp^{(-0.0241*D)} - f \\acf &= wt * reduc * (dead * f + 0.5 * b)\end{aligned}$$

WH  
(Brown, 1978)

$$\begin{aligned}wt &= \exp^{(0.7218+1.7502*\log(D))} \\f &= 0.547 * \exp^{(-0.0370*D)} \\b &= 0.835 * \exp^{(-0.0380*D)} - f \\acf &= wt * reduc * (dead * f + 0.5 * b)\end{aligned}$$

$$(1) \text{ wt. foli} = 2.2 * \exp^{-3.8169+1.9756*\log(Dcm)}$$

$$(2) f = 0.547 * \exp^{-0.0370*D}$$

$$(3) b = 0.835 * \exp^{-0.0380*D}$$

MH

(Gholol et al.,  
1979; Brown,  
1978)

$$D > 40$$

$$f = 0.125$$

$$b = 0.182$$

$$\text{wt. branch} = \text{wt. foli} * \frac{(b - f)}{f}$$

$$\text{acf} = \text{wt} * \text{reduc} * (\text{dead} * f + 0.5 * b)$$

Eq. (1) Gholol et al. (1979), Eq. (2) & (3) Brown (1978)

Mass of fine branches estimated using relative values for WH from Brown (1978)

PY

(Grier, 1992)

$$\text{brasml} = 10^{(-1.613+2.088*\log_{10}(Dcm))}$$

$$\text{tptfol} = 10^{(-0.946+1.565*\log_{10}(Dcm))}$$

$$\text{acf} = 2.2 * (\text{totfol} * \text{dead} + 0.33 * \text{brasml}) * \text{reduc}$$

EP

(Ker, 1980b)

$$\text{wt. crown. kg} = \exp^{-2.0241+1.6296*\log(Dcm)}$$

$$\text{wt. foliage. kg} = \exp^{-2.6925+1.4653*\log(Dcm)}$$

$$f = \frac{\text{wt. foliage. kg}}{\text{wt. crown. kg}}$$

$$b = \frac{1}{(1.15 + 0.0416 * D)} - f$$

$$\text{wt. branch. kg} = b * \text{wt. crown. kg}$$

$$\text{acf} = 2.2 * \text{reduc} * (\text{wt. foliage. kg} * \text{dead} + \text{wt. branch. kg} * 0.5)$$

EH

(Ker, 1980b)

$$\text{wt. crown. kg} = \exp^{-2.2934+1.8442*\log(Dcm)}$$

$$\text{wt. foliage. kg} = \exp^{-3.0924+1.6829*\log(Dcm)}$$

$$f = \frac{\text{wt. foliage. kg}}{\text{wt. crown. kg}}$$

$$b = 0.835 * \exp^{-0.0380*D} - f$$

$$\text{wt. branch. kg} = b * \text{wt. crown. kg}$$

$$\text{acf} = 2.2 * \text{reduc} * (\text{wt. foliage. kg} * \text{dead} + \text{wt. branch. kg} * 0.5)$$

BF  
(Ker,1980a;  
Brown, 1978)

$$wt. crown. kg = \exp^{(-2.0259+1.7433*\log(Dcm))}$$

$$wt. foliage. kg = \exp^{(-2.7854+1.7433*\log(Dcm))}$$

$$f = \frac{wt. foliage. kg}{wt. crown. kg}$$

$$b = \frac{1}{(1.15 + 0.0416 * D)} - f$$

$$wt. branch. kg = b * wt. crown. kg$$

$$acf = 2.2 * reduc * (wt. foliage. kg * dead + wt. branch. kg * 0.5)$$

Fraction of canopy mass as fine branch estimated using GF from Brown (1978)

BS  
(Ker,1980a;  
Brown, 1978)

$$wt. crown. kg = \exp^{(-2.000+1.8570*\log(Dcm))}$$

$$wt. foliage. kg = \exp^{(-2.5387+1.8570*\log(Dcm))}$$

$$f = \frac{wt. foliage. kg}{wt. crown. kg}$$

$$b = \frac{1}{(1.15 + 0.0416 * D)} - f$$

$$wt. branch. kg = b * wt. crown. kg$$

$$acf = 2.2 * reduc * (wt. foliage. kg * dead + wt. branch. kg * 0.5)$$

Fraction of canopy mass as fine branch estimated using GF from Brown (1978)

WS  
(Ker, 1980a)

$$wt. crown. kg = \exp^{(-2.7323+2.0433*\log(Dcm))}$$

$$wt. foliage. kg = \exp^{(-3.2985+1.9103*\log(Dcm))}$$

$$f = \frac{wt. foliage. kg}{wt. crown. kg}$$

$$b = \frac{1}{(1.15 + 0.0416 * D)} - f$$

$$wt. branch. kg = b * wt. crown. kg$$

$$acf = 2.2 * reduc * (wt. foliage. kg * dead + wt. branch. kg * 0.5)$$

RP  
(Ker, 1980a)

$$wt. crown. kg = \exp^{(-3.9952+2.3287*\log(Dcm))}$$

$$wt. foliage. kg = \exp^{(-4.4257+2.1220*\log(Dcm))}$$

$$f = \frac{wt. foliage. kg}{wt. crown. kg}$$

$$b = \frac{1}{(1.15 + 0.0416 * D)} - f$$

$$wt. branch. kg = b * wt. crown. kg$$

$$acf = 2.2 * reduc * (wt. foliage. kg * dead + wt. branch. kg * 0.5)$$

RS  
(Freedman et  
al., 1982)

$$wt. crown. kg = \exp^{(-2.8371+2.1136*\log(Dcm))}$$

$$wt. foliage. kg = \exp^{(-4.1968+2.2167*\log(Dcm))}$$

$$f = \frac{wt. foliage. kg}{wt. crown. kg}$$

$$b = \frac{1}{(1.15 + 0.0416 * D)} - f$$

$$wt. branch. kg = b * wt. crown. kg$$

$$acf = 2.2 * reduc * (wt. foliage. kg * dead + wt. branch. kg * 0.5)$$

PI  
(Duvenek,  
2005)

$$wt. g = \exp^{(2.37724+2.47786*\log(Dcm))}$$

$$f = \frac{\exp^{(1.72630+2.30627*\log(Dcm))}}{wt. g}$$

$$b = \frac{\exp^{(1.38394+2.26384*\log(Dcm))}}{wt. g}$$

$$acf = \frac{2.2}{1000} * wt. g * reduc * (f * dead + b * 0.5)$$

LO  
(Rogerson,  
1964)

$$wt. foliage. kg = 10^{(2.67156*\log(D)-1.79586)}$$

$$acf = 2.2 * reduc * (wt. foliage. kg * dead + 0.50 * 0.25 * wt. foliage. kg)$$

Assume mass of fine branches = 25% of foliage mass

**Table S2.** Description of variables in Table S1 equations.

| Variable             | Description                                                                                                                             |
|----------------------|-----------------------------------------------------------------------------------------------------------------------------------------|
| <i>Acf</i>           | Mass of foliage plus half of small branch wood ( $\leq 0.25$ inch diameter)                                                             |
| <i>F</i>             | Fraction of canopy mass that is foliage, <i>b</i> is the fraction of canopy mass that is small branch wood ( $\leq 0.25$ inch diameter) |
| <i>B</i>             | Fraction of canopy mass that is small branch wood ( $\leq 0.25$ inch diameter)                                                          |
| <i>Wt</i>            | Weight of tree crown (lb)                                                                                                               |
| <i>D</i>             | Tree diameter at breast height (inches)                                                                                                 |
| <i>wt.foliage.kg</i> | Mass of foliage (kg)                                                                                                                    |
| <i>wt.branch.kg</i>  | Mass of small branch wood (kg)                                                                                                          |
| <i>wt.crown.kg</i>   | Mass of tree crown (kg)                                                                                                                 |
| <i>wt.g</i>          | Mass of tree crown (g)                                                                                                                  |
| <i>Dcm</i>           | Tree diameter at breast height (cm)                                                                                                     |
| <i>Reduc</i>         | Factor to reduce a tree's crown weight based on its crown condition class (see Table S3)                                                |
| <i>Dead</i>          | Value was set to 0 for dead trees, otherwise set to 1, reduces foliage mass to 0 for dead trees                                         |

**Table S3.** Tree Species Crosswalk and Crown Condition. Crosswalk of FIA TREE table species codes (SPCD) to Crown Condition Codes and canopy weight reduction factors (*reduc*) for available canopy fuel calculations.

| SPCD | Canopy Code | Canopy                | Crown Condition Class ( <i>reduc</i> ) |      |      |      |     |
|------|-------------|-----------------------|----------------------------------------|------|------|------|-----|
|      |             | Code for <i>reduc</i> | DOM                                    | CDOM | INT  | SUP  | OTH |
| 299  | PP          | PP                    | 0.55                                   | 0.55 | 0.3  | 0.15 | 0.5 |
| 11   | GF          | WF                    | 0.85                                   | 0.85 | 0.35 | 0.3  | 0.5 |
| 12   | BF          | WF                    | 0.85                                   | 0.85 | 0.35 | 0.3  | 0.5 |
| 14   | GF          | WF                    | 0.85                                   | 0.85 | 0.35 | 0.3  | 0.5 |
| 15   | GF          | WF                    | 0.85                                   | 0.85 | 0.35 | 0.3  | 0.5 |
| 16   | BF          | WF                    | 0.85                                   | 0.85 | 0.35 | 0.3  | 0.5 |
| 17   | GF          | WF                    | 0.85                                   | 0.85 | 0.35 | 0.3  | 0.5 |
| 10   | GF          | WF                    | 0.85                                   | 0.85 | 0.35 | 0.3  | 0.5 |
| 19   | SF          | WF                    | 0.85                                   | 0.85 | 0.35 | 0.3  | 0.5 |
| 18   | SF          | WF                    | 0.85                                   | 0.85 | 0.35 | 0.3  | 0.5 |
| 20   | GF          | WF                    | 0.85                                   | 0.85 | 0.35 | 0.3  | 0.5 |
| 22   | GF          | WF                    | 0.85                                   | 0.85 | 0.35 | 0.3  | 0.5 |
| 21   | GF          | WF                    | 0.85                                   | 0.85 | 0.35 | 0.3  | 0.5 |
| 81   | WC          | IC                    | 1.1                                    | 1.1  | 0.75 | 0.4  | 0.5 |
| 40   | AC          | IC                    | 1.1                                    | 1.1  | 0.75 | 0.4  | 0.5 |
| 41   | WC          | IC                    | 1.1                                    | 1.1  | 0.75 | 0.4  | 0.5 |
| 42   | WC          | IC                    | 1.1                                    | 1.1  | 0.75 | 0.4  | 0.5 |
| 43   | AC          | IC                    | 1.1                                    | 1.1  | 0.75 | 0.4  | 0.5 |
| 51   | WC          | IC                    | 1.1                                    | 1.1  | 0.75 | 0.4  | 0.5 |
| 52   | WC          | IC                    | 1.1                                    | 1.1  | 0.75 | 0.4  | 0.5 |
| 54   | WC          | IC                    | 1.1                                    | 1.1  | 0.75 | 0.4  | 0.5 |
| 50   | WC          | IC                    | 1.1                                    | 1.1  | 0.75 | 0.4  | 0.5 |
| 55   | WC          | IC                    | 1.1                                    | 1.1  | 0.75 | 0.4  | 0.5 |
| 61   | JP          | PJ                    | 1                                      | 1    | 1    | 1    | 1   |
| 62   | JP          | PJ                    | 1                                      | 1    | 1    | 1    | 1   |
| 59   | JP          | PJ                    | 1                                      | 1    | 1    | 1    | 1   |
| 63   | JP          | PJ                    | 1                                      | 1    | 1    | 1    | 1   |
| 60   | JP          | PJ                    | 1                                      | 1    | 1    | 1    | 1   |
| 69   | JP          | PJ                    | 1                                      | 1    | 1    | 1    | 1   |
| 57   | JP          | PJ                    | 1                                      | 1    | 1    | 1    | 1   |
| 64   | JP          | PJ                    | 1                                      | 1    | 1    | 1    | 1   |
| 65   | JP          | PJ                    | 1                                      | 1    | 1    | 1    | 1   |



|      |    |    |      |      |      |      |     |
|------|----|----|------|------|------|------|-----|
| 58   | JP | PJ | 1    | 1    | 1    | 1    | 1   |
| 66   | JP | PJ | 1    | 1    | 1    | 1    | 1   |
| 68   | JP | PJ | 1    | 1    | 1    | 1    | 1   |
| 67   | AC | IC | 1.1  | 1.1  | 0.75 | 0.4  | 0.5 |
| 71   | WL | PP | 0.55 | 0.55 | 0.3  | 0.15 | 0.5 |
| 72   | WL | WF | 0.85 | 0.85 | 0.35 | 0.3  | 0.5 |
| 73   | WL | PP | 0.55 | 0.55 | 0.3  | 0.15 | 0.5 |
| 70   | WL | PP | 0.55 | 0.55 | 0.3  | 0.15 | 0.5 |
| 91   | ES | DF | 1.15 | 1.15 | 1.15 | 0.75 | 0.5 |
| 101  | WB | LP | 0.6  | 0.6  | 0.6  | 0.3  | 0.5 |
| 102  | LP | LP | 0.6  | 0.6  | 0.6  | 0.3  | 0.5 |
| 135  | PP | PS | 0.3  | 0.3  | 0.15 | 0.1  | 0.5 |
| 103  | PP | PP | 0.55 | 0.55 | 0.3  | 0.15 | 0.5 |
| 104  | LP | LP | 0.6  | 0.6  | 0.6  | 0.3  | 0.5 |
| 105  | LP | LP | 0.6  | 0.6  | 0.6  | 0.3  | 0.5 |
| 105  | LP | LP | 0.6  | 0.6  | 0.6  | 0.3  | 0.5 |
| 92   | ES | DF | 1.15 | 1.15 | 1.15 | 0.75 | 0.5 |
| 140  | PY | PJ | 1    | 1    | 1    | 1    | 1   |
| 90   | RS | DF | 1.15 | 1.15 | 1.15 | 0.75 | 0.5 |
| 107  | LO | PP | 0.55 | 0.55 | 0.3  | 0.15 | 0.5 |
| 108  | LP | LP | 0.6  | 0.6  | 0.6  | 0.3  | 0.5 |
| 109  | PP | PP | 0.55 | 0.55 | 0.3  | 0.15 | 0.5 |
| 134  | PY | PJ | 1    | 1    | 1    | 1    | 1   |
| 110  | LO | PP | 0.55 | 0.55 | 0.3  | 0.15 | 0.5 |
| 106  | PY | PJ | 1    | 1    | 1    | 1    | 1   |
| 111  | LP | LP | 0.6  | 0.6  | 0.6  | 0.3  | 0.5 |
| 93   | ES | WF | 0.85 | 0.85 | 0.35 | 0.3  | 0.5 |
| 112  | PP | PP | 0.55 | 0.55 | 0.3  | 0.15 | 0.5 |
| 113  | LP | PP | 0.55 | 0.55 | 0.3  | 0.15 | 0.5 |
| 94   | WS | DF | 1.15 | 1.15 | 1.15 | 0.75 | 0.5 |
| 115  | LO | PP | 0.55 | 0.55 | 0.3  | 0.15 | 0.5 |
| 116  | PP | PP | 0.55 | 0.55 | 0.3  | 0.15 | 0.5 |
| 117  | PP | PP | 0.55 | 0.55 | 0.3  | 0.15 | 0.5 |
| 118  | PP | PS | 0.3  | 0.3  | 0.15 | 0.1  | 0.5 |
| 142  | LP | LP | 0.6  | 0.6  | 0.6  | 0.3  | 0.5 |
| 95   | BS | DF | 1.15 | 1.15 | 1.15 | 0.75 | 0.5 |
| 8184 | RP | LP | 0.6  | 0.6  | 0.6  | 0.3  | 0.5 |

|      |    |    |      |      |      |      |     |
|------|----|----|------|------|------|------|-----|
| 133  | PY | PJ | 1    | 1    | 1    | 1    | 1   |
| 119  | WP | LP | 0.6  | 0.6  | 0.6  | 0.3  | 0.5 |
| 143  | PY | PJ | 1    | 1    | 1    | 1    | 1   |
| 120  | LP | LP | 0.6  | 0.6  | 0.6  | 0.3  | 0.5 |
| 136  | LP | LP | 0.6  | 0.6  | 0.6  | 0.3  | 0.5 |
| 100  | PP | PP | 0.55 | 0.55 | 0.3  | 0.15 | 0.5 |
| 121  | LO | PP | 0.55 | 0.55 | 0.3  | 0.15 | 0.5 |
| 8188 | PP | PP | 0.55 | 0.55 | 0.3  | 0.15 | 0.5 |
| 122  | PP | PP | 0.55 | 0.55 | 0.3  | 0.15 | 0.5 |
| 96   | ES | DF | 1.15 | 1.15 | 1.15 | 0.75 | 0.5 |
| 123  | LP | LP | 0.6  | 0.6  | 0.6  | 0.3  | 0.5 |
| 138  | PY | PJ | 1    | 1    | 1    | 1    | 1   |
| 124  | PP | PP | 0.55 | 0.55 | 0.3  | 0.15 | 0.5 |
| 125  | LP | LP | 0.6  | 0.6  | 0.6  | 0.3  | 0.5 |
| 125  | LP | LP | 0.6  | 0.6  | 0.6  | 0.3  | 0.5 |
| 141  | PY | PJ | 1    | 1    | 1    | 1    | 1   |
| 126  | PI | PP | 0.55 | 0.55 | 0.3  | 0.15 | 0.5 |
| 97   | RS | DF | 1.15 | 1.15 | 1.15 | 0.75 | 0.5 |
| 127  | PP | PP | 0.55 | 0.55 | 0.3  | 0.15 | 0.5 |
| 128  | PI | PP | 0.55 | 0.55 | 0.3  | 0.15 | 0.5 |
| 98   | ES | DF | 1.15 | 1.15 | 1.15 | 0.75 | 0.5 |
| 129  | EP | DF | 1.15 | 1.15 | 1.15 | 0.75 | 0.5 |
| 114  | LP | PP | 0.55 | 0.55 | 0.3  | 0.15 | 0.5 |
| 130  | LP | LP | 0.6  | 0.6  | 0.6  | 0.3  | 0.5 |
| 131  | LO | PP | 0.55 | 0.55 | 0.3  | 0.15 | 0.5 |
| 139  | LO | PP | 0.55 | 0.55 | 0.3  | 0.15 | 0.5 |
| 132  | LP | LP | 0.6  | 0.6  | 0.6  | 0.3  | 0.5 |
| 137  | PP | PP | 0.55 | 0.55 | 0.3  | 0.15 | 0.5 |
| 200  | DF | DF | 1.15 | 1.15 | 1.15 | 0.75 | 0.5 |
| 201  | DF | DF | 1.15 | 1.15 | 1.15 | 0.75 | 0.5 |
| 202  | DF | DF | 1.15 | 1.15 | 1.15 | 0.75 | 0.5 |
| 212  | WC | DF | 1.15 | 1.15 | 1.15 | 0.75 | 0.5 |
| 211  | WC | DF | 1.15 | 1.15 | 1.15 | 0.75 | 0.5 |
| 222  | WC | DF | 1.15 | 1.15 | 1.15 | 0.75 | 0.5 |
| 231  | WC | WF | 0.85 | 0.85 | 0.35 | 0.3  | 0.5 |
| 221  | WC | DF | 1.15 | 1.15 | 1.15 | 0.75 | 0.5 |
| 232  | WC | WF | 0.85 | 0.85 | 0.35 | 0.3  | 0.5 |

|     |    |    |      |      |      |      |     |
|-----|----|----|------|------|------|------|-----|
| 230 | WC | WF | 0.85 | 0.85 | 0.35 | 0.3  | 0.5 |
| 241 | WC | IC | 1.1  | 1.1  | 0.75 | 0.4  | 0.5 |
| 261 | EH | DF | 1.15 | 1.15 | 1.15 | 0.75 | 0.5 |
| 262 | EH | DF | 1.15 | 1.15 | 1.15 | 0.75 | 0.5 |
| 263 | WH | DF | 1.15 | 1.15 | 1.15 | 0.75 | 0.5 |
| 264 | WH | DF | 1.15 | 1.15 | 1.15 | 0.75 | 0.5 |
| 260 | EH | DF | 1.15 | 1.15 | 1.15 | 0.75 | 0.5 |

---

AC = Atlantic White Cedar, BF = Balsam Fir, BS= Black Spruce, DF = Douglas Fir, EH = Eastern Hemlock, EP = Eastern White Pine, ES = Engelmann Spruce, GF = Grand Fir, JP = Oneseed Juniper, LO = Loblolly Pine, LP = Lodgepole Pine, PI = Pitch Pine, PP =Ponderosa Pine, PY = Pinyon Pine, RP = Red Pine, RS = Red Spruce, SF = Subalpine Fir, WB = Whitebark Pine, WC = Western Redcedar, WH =Western Hemlock, WL = Western Larch, WP =Western White Pine, WS = White Spruce.

## Emission factors

The modified combustion efficiencies (MCE; the molar ratio of emitted CO<sub>2</sub> to the sum of emitted CO<sub>2</sub> and CO (MCE =  $\Delta\text{CO}_2/(\Delta\text{CO}_2 + \Delta\text{CO})$ )) and emission factors (EF) for 98 fires measured in multiple field studies (Table S4) were used to derive best estimate EF for use in the Missoula Fire Lab Emission Inventory (MFLEI). The data in Table S4 was used to model EF for CO<sub>2</sub>, CO, CH<sub>4</sub>, and PM<sub>2.5</sub> as a linear function of MCE for forest and rangeland fires. The EF plotted versus MCE and linear least squares regression fit lines and statistics are shown in Figure S1 for forest fires and Figure S2 for rangeland fires. The linear functions in Figures S1 and S2 were combined with best estimate MCE values of 0.881, 0.933, and 0.942 for western/northern forest, southern forest, and rangeland fires, respectively, (Urbanski, 2014) to derive the EF used in the MFLEI.

Table S4. MCE and EF (g kg<sup>-1</sup>) from field studies used in MFLEI.

| Fire ID <sup>1</sup> | Region | Fire Type <sup>2</sup> | Cover Type | Platform <sup>3</sup> | MCE   | CO <sub>2</sub> | CO  | CH <sub>4</sub> | PM <sub>2.5</sub> | Ref <sup>4</sup> |
|----------------------|--------|------------------------|------------|-----------------------|-------|-----------------|-----|-----------------|-------------------|------------------|
| FL1                  | South  | PF                     | forest     | tower                 | 0.952 | 1712            | 55  | 1.41            | 10                | U09              |
| FL2                  | South  | PF                     | forest     | tower                 | 0.94  | 1690            | 69  | 1.26            | 11.3              | U09              |
| FL4                  | South  | PF                     | forest     | tower                 | 0.934 | 1681            | 75  | 1.45            | 11.1              | U09              |
| ICI1                 | south  | PF                     | forest     | tower                 | 0.942 | 1687            | 67  | 1.78            | 13.2              | U09              |
| ICI2                 | south  | PF                     | forest     | tower                 | 0.928 | 1657            | 82  | 2.31            | 15.6              | U09              |
| NC1                  | south  | PF                     | forest     | tower                 | 0.904 | 1621            | 109 | 3               | 10.4              | U09              |
| SC1                  | south  | PF                     | forest     | tower                 | 0.921 | 1647            | 90  | 2.15            | 14.1              | U09              |
| SC12A                | south  | PF                     | forest     | tower                 | 0.942 | 1688            | 66  | 1.75            | 14.4              | U09              |
| SC12B                | south  | PF                     | forest     | tower                 | 0.923 | 1651            | 88  | 2.26            | 14.5              | U09              |
| SC3                  | south  | PF                     | forest     | tower                 | 0.936 | 1682            | 73  | 1.99            | 11.4              | U09              |
| SC4                  | south  | PF                     | forest     | tower                 | 0.936 | 1679            | 73  | 1.64            | 12.2              | U09              |
| SC5                  | south  | PF                     | forest     | tower                 | 0.941 | 1683            | 67  | 1.59            | 15.4              | U09              |
| SC6                  | south  | PF                     | forest     | tower                 | 0.932 | 1651            | 77  | 2.04            | 21.9              | U09              |
| SC7                  | south  | PF                     | forest     | tower                 | 0.915 | 1630            | 96  | 2.89            | 16.2              | U09              |
| SC8                  | south  | PF                     | forest     | tower                 | 0.918 | 1653            | 94  | 3.39            | 11.5              | U09              |
| EB1                  | south  | PF                     | forest     | tower                 | 0.921 | 1652            | 90  | 2.62            | 11.9              | U09              |
| EB2                  | south  | PF                     | forest     | tower                 | 0.938 | 1695            | 71  | 1.65            | 6.9               | U09              |
| FL5                  | south  | PF                     | forest     | tower                 | 0.933 | 1665            | 76  | 2.13            | 15.7              | U09              |
| SC9                  | south  | PF                     | forest     | tower                 | 0.935 | 1682            | 75  | 2.66            | 8.9               | U09              |
| FS1                  | south  | PF                     | forest     | tower                 | 0.936 | 1681            | 74  | 2.16            | 9.7               | U09              |
| ICI3                 | south  | PF                     | forest     | tower                 | 0.912 | 1626            | 100 | 3.34            | 15.3              | U09              |
| Camp Lejeune IA      | south  | PF                     | forest     | air                   | 0.943 | 1691            | 65  | 1.6             | 9.5               | B11              |

|                       |       |    |        |       |       |      |     |      |      |     |
|-----------------------|-------|----|--------|-------|-------|------|-----|------|------|-----|
| Little Florida 1      | south | PF | forest | air   | 0.951 | 1714 | 56  | 1.33 | 7.3  | B11 |
| Little Florida 2      | south | PF | forest | air   | 0.957 | 1725 | 50  | 1.2  | 7    | B11 |
| Bear Pen Camp         | south | PF | forest | air   | 0.942 | 1660 | 65  | 2.16 | 22.6 | B11 |
| Lejeune ME            | south | PF | forest | air   | 0.945 | 1696 | 63  | 1.69 | 9.1  | B11 |
| Holly Shelter Block 6 | south | PF | forest | air   | 0.952 | 1733 | 55  | 2.69 | NA   | B11 |
| Block 6               | south | PF | forest | air   | 0.932 | 1674 | 78  | 1.74 | NA   | A13 |
| Block 9b              | south | PF | forest | air   | 0.919 | 1643 | 92  | 2.08 | 3.4  | A13 |
| Block 22b             | south | PF | forest | air   | 0.935 | 1679 | 74  | 2.01 | 7.3  | A13 |
| Pine Plantation       | south | PF | forest | air   | 0.904 | 1606 | 109 | 6.66 | 4.2  | A13 |
| Georgetown            | south | PF | forest | air   | 0.938 | 1696 | 72  | 2.22 | 5.5  | A13 |
| Francis Marion        | south | PF | forest | air   | 0.933 | 1686 | 78  | 1.88 | 4.6  | A13 |
| Bamberg               | south | PF | forest | air   | 0.957 | 1739 | 49  | 2.02 | 1.4  | A13 |
| CL1                   | south | PF | forest | air   | 0.925 | 1682 | 88  | 3.73 | NA   | Y99 |
| CL2                   | south | PF | forest | air   | 0.927 | 1671 | 84  | 5.18 | NA   | Y99 |
| AZ1                   | west  | PF | forest | tower | 0.941 | 1698 | 68  | 3.2  | 6.2  | U09 |
| AZ2                   | west  | PF | forest | tower | 0.89  | 1605 | 127 | 4.86 | 21.4 | U09 |
| AZ3                   | west  | PF | forest | tower | 0.924 | 1658 | 87  | 2.26 | 11.9 | U09 |
| AZ4                   | west  | PF | forest | tower | 0.932 | 1668 | 78  | 2.29 | 13.4 | U09 |
| AZ5                   | west  | PF | forest | tower | 0.91  | 1607 | 101 | 4.37 | 20.9 | U09 |
| AZ6                   | west  | PF | forest | tower | 0.924 | 1648 | 87  | 3.12 | 14.5 | U09 |
| AZ7                   | west  | PF | forest | tower | 0.918 | 1640 | 93  | 3.53 | 13   | U09 |
| AZ8                   | west  | PF | forest | tower | 0.926 | 1650 | 84  | 3.32 | 15.4 | U09 |
| AZ9                   | west  | PF | forest | tower | 0.919 | 1639 | 92  | 3.53 | 14.4 | U09 |
| AZ10                  | west  | PF | forest | tower | 0.938 | 1678 | 70  | 2.49 | 14.8 | U09 |
| AZ11                  | west  | PF | forest | tower | 0.948 | 1717 | 59  | 1.62 | 6.2  | U09 |
| AZ12                  | west  | PF | forest | tower | 0.916 | 1622 | 94  | 3.22 | 20.8 | U09 |
| BC1                   | west  | PF | forest | tower | 0.894 | 1542 | 117 | 5.71 | 29   | U09 |
| BC2                   | west  | PF | forest | tower | 0.889 | 1568 | 125 | 6.47 | 16   | U09 |
| MT1                   | west  | PF | forest | tower | 0.914 | 1632 | 97  | 4.02 | 12.7 | U09 |
| MT2                   | west  | PF | forest | tower | 0.904 | 1584 | 107 | 3.26 | 15.3 | U09 |
| MT3                   | west  | PF | forest | tower | 0.918 | 1640 | 93  | 4.38 | 11.7 | U09 |
| MT4                   | west  | PF | forest | tower | 0.91  | 1610 | 101 | 4.44 | 19.5 | U09 |
| OR1                   | west  | PF | forest | tower | 0.906 | 1601 | 106 | 3.85 | 20.3 | U09 |
| OR2                   | west  | PF | forest | tower | 0.9   | 1603 | 114 | 5.23 | 14.5 | U09 |

|                        |       |    |        |       |       |      |     |      |      |     |
|------------------------|-------|----|--------|-------|-------|------|-----|------|------|-----|
| OR3                    | west  | PF | forest | tower | 0.916 | 1609 | 94  | 4.01 | 15.7 | U09 |
| Shaver                 | west  | PF | forest | air   | 0.885 | 1523 | 126 | 7.94 | 24.2 | B11 |
| Turtle                 | west  | PF | forest | air   | 0.913 | 1599 | 97  | 5.51 | 19   | B11 |
| Myrtle -<br>Fall Creek | west  | WF | forest | air   | 0.907 | 1626 | 106 | 3    | 6.1  | R91 |
| Silver                 | west  | WF | forest | air   | 0.921 | 1637 | 89  | 2.6  | 20.2 | R91 |
| Mabel Lake             | west  | PF | forest | air   | 0.927 | 1660 | 83  | 3.5  | 12.8 | R91 |
| NF13                   | west  | WF | forest | air   | 0.867 | 1570 | 154 | 7.89 | NA   | U13 |
| BSL17                  | west  | WF | forest | air   | 0.893 | 1622 | 123 | 6.43 | NA   | U13 |
| BSL22                  | west  | WF | forest | air   | 0.874 | 1583 | 145 | 7.85 | NA   | U13 |
| HC22                   | west  | WF | forest | air   | 0.897 | 1628 | 119 | 6.36 | NA   | U13 |
| SC24                   | west  | WF | forest | air   | 0.873 | 1583 | 146 | 7.57 | NA   | U13 |
| SC25                   | west  | WF | forest | air   | 0.885 | 1605 | 132 | 7.46 | NA   | U13 |
| SC26                   | west  | WF | forest | air   | 0.882 | 1598 | 136 | 7.71 | NA   | U13 |
| SC27                   | west  | WF | forest | air   | 0.889 | 1612 | 129 | 6.96 | NA   | U13 |
| BSL28                  | west  | WF | forest | air   | 0.884 | 1601 | 134 | 7.69 | NA   | U13 |
| Quinalt                | west  | PF | forest | air   | 0.85  | 1448 | 162 | 14   | 25.5 | H96 |
| Creamery               | west  | PF | forest | air   | 0.905 | 1535 | 103 | 12.7 | 27   | H96 |
| Raymond                | west  | PF | forest | air   | 0.877 | 1536 | 138 | 6.7  | 32.5 | H96 |
| Corral                 | west  | WF | forest | air   | 0.81  | 1311 | 196 | 18   | 41.4 | H96 |
| MN4                    | west  | PF | forest | tower | 0.953 | 1717 | 54  | 1.5  | 10.1 | U09 |
| MN5                    | west  | PF | forest | tower | 0.936 | 1684 | 73  | 2.28 | 10   | U09 |
| MN6                    | west  | PF | forest | tower | 0.942 | 1693 | 66  | 2.07 | 11.5 | U09 |
| Grant A test           | west  | PF | shrub  | air   | 0.95  | 1709 | 58  | 2.37 | 6    | B11 |
| Grant A                | west  | PF | shrub  | air   | 0.938 | 1679 | 70  | 3.34 | 7.5  | B11 |
| Grant B                | west  | PF | shrub  | air   | 0.903 | 1603 | 109 | 6.31 | 8.7  | B11 |
| Williams               | west  | PF | shrub  | air   | 0.933 | 1666 | 76  | 3.77 | 8.6  | B11 |
| Atmore                 | west  | PF | shrub  | air   | 0.974 | 1705 | 61  | 3.1  | 4.9  | B11 |
| T2                     | west  | PF | shrub  | air   | 0.94  | 1681 | 69  | 3.23 | 6.8  | B11 |
| Bear                   | west  | PF | shrub  | tower | 0.927 | 1601 | 80  | 4    | 8.6  | H96 |
| Newall                 | west  | PF | shrub  | tower | 0.918 | 1602 | 91  | 3.55 | 8.5  | H96 |
| Lodi 1                 | west  | PF | shrub  | air   | 0.935 | 1664 | 74  | 2.4  | 13.5 | R91 |
| Lodi 2                 | west  | PF | shrub  | air   | 0.933 | 1650 | 75  | 3.6  | 23   | R91 |
| Eagle                  | west  | PF | shrub  | air   | 0.97  | 1748 | 34  | 0.9  | 11.3 | R91 |
| EP1                    | south | PF | grass  | tower | 0.914 | 1636 | 98  | 4.12 | 9.1  | U09 |
| EP2A                   | south | PF | grass  | tower | 0.936 | 1689 | 74  | 2.27 | 5.9  | U09 |
| EP2B                   | south | PF | grass  | tower | 0.961 | 1743 | 46  | 1.54 | 3.7  | U09 |

|      |       |    |       |       |       |      |     |      |      |     |
|------|-------|----|-------|-------|-------|------|-----|------|------|-----|
| MI1  | south | PF | grass | tower | 0.97  | 1752 | 35  | 0.9  | 9.9  | U09 |
| FS1  | south | PF | grass | tower | 0.936 | 1681 | 74  | 2.16 | 9.7  | U09 |
| ICI3 | south | PF | grass | tower | 0.912 | 1626 | 100 | 3.34 | 15.3 | U09 |
| MIN1 | west  | PF | grass | tower | 0.948 | 1716 | 60  | 1.5  | 5.3  | U09 |
| MN2  | west  | PF | grass | tower | 0.933 | 1652 | 76  | 2.68 | 18.8 | U09 |
| MN3  | west  | PF | grass | tower | 0.95  | 1705 | 57  | 1.53 | 11.8 | U09 |
| MN4  | west  | PF | grass | tower | 0.962 | 1750 | 44  | 1.07 | 3.6  | U09 |

<sup>1</sup>Fire identifiers taken from cited publications

<sup>2</sup>Fire type: PF = prescribed fire, WF = wildfire

<sup>3</sup>Platform: Sampling platform, aircraft (air) or tower.

<sup>4</sup>A13 = Akagi et al., 2013; B11 = Burling et al., 2011; H96 = Hobbs et al., 1996; R91 = Radke, 1991; U09 = Urbanski et al., 2009; Y99 = Yokelson et al., 1999

## References

- Akagi, S. K., Yokelson, R. J., Burling, I. R., Meinardi, S., Simpson, I., Blake, D. R., McMeeking, G. R., Sullivan, A., Lee, T., Kreidenweis, S., Urbanski, S., et al.: Measurements of reactive trace gases and variable O<sub>3</sub> formation rates in some South Carolina biomass burning plumes, *Atmos. Chem. Phys.*, 13(3), 1141–1165, doi:10.5194/acp-13-1141-2013, 2013.
- Bechtold, W.A. and Patterson, P.L. (Eds.): The enhanced Forest Inventory and Analysis program—national sampling design and estimation procedures, Gen. Tech Rep. SRS-80, USDA, Forest Service, Southern Research Station, Asheville, North Carolina, 85 pp., available at: <https://www.treearch.fs.fed.us/pubs/20371>, last access: 27 April 2017, 2005.
- Brown, J. K.: Weight and density of crowns of Rocky Mountain conifers, Res. Pap. INT-RP-197, U.S. Department of Agriculture, Forest Service, Intermountain Forest and Range Experiment Station, Ogden, UT, 56 p, 1978.
- Burling, I. R., Yokelson, R. J., Akagi, S. K., Urbanski, S. P., Wold, C. E., Griffith, D. W. T., Johnson, T. J., Reardon, J. and Weise, D. R.: Airborne and ground-based measurements of the trace gases and particles emitted by prescribed fires in the United States, *Atmos. Chem. Phys.*, 11(23), 12197–12216, doi:10.5194/acp-11-12197-2011, 2011.
- Duveneck, M. J.: Characterizing Canopy Fuels as They Affect Fire Behavior in Pitch Pine (*Pinus Rigida*), MS Thesis, University of Massachusetts, Amherst, 2005.
- Freedom, B., Duinker, P. Barclay, H., Morash, R., and Prager, U.: Forest biomass and nutrient studies in central Nova Scotia, Maritimes Forest Research Centre, Can. For. Serv., Dep. of the Environ. Inf. Rep. M-X-134, 1982.
- Gholz, H.L., Grier, C.C., Campbell, A.G., and Brown, A.T.: Equations for estimating biomass and leaf area of plants in the Pacific Northwest, Res. Pap. 41, Forestry Research Laboratory, Oregon State University, School of Forestry, Corvallis, OR, 38 pp., 1979.
- Grier, C.C., Elliott, K.J., McCullough, D.G.: Biomass distribution and productivity of *Pinus edulis*-*Juniperus monosperma* woodlands of north-central Arizona, *Forest Ecology and Management*, 50, 331-350, 1992.
- Hobbs, P. V., Reid, J. S., Herring, J. A., Nance, J. D., Weiss, R. E., Ross, J. L., Hegg, D. A., Ottmar, R. O. and Liouise, C.: Particle and trace-gas measurements in the smoke from prescribed burns of forest products in the Pacific Northwest, in *Biomass Burning and Global Change*, pp. 697–715, MIT Press, Cambridge, Mass., 1996.

Ker, M.: Tree biomass equations for ten major species in Cumberland County, Nova Scotia, Report M-X-108, Canadian Forest Service Maritime Forest Research Center, Fredericton, NB, Canada, 26 p., 1980a.

Ker, M.: Tree biomass equations for seven species in Southwestern New Brunswick, Report M-X-114, Canadian Forest Service Maritime Forest Research Center, Fredericton, NB, Canada, 18 p., 1980b.

Lutes, D. C.: FuelCalc 1.4 User's Guide, USDA, Forest Service, Rocky Mountain Research Station, Fire Modeling Institute, available at: [https://www.firelab.org/sites/default/files/images/downloads/FuelCalc\\_User\\_Guide\\_0.pdf](https://www.firelab.org/sites/default/files/images/downloads/FuelCalc_User_Guide_0.pdf), last access: 27 April 2017, 2016.

O'Connell, B. M., Conkling, B. L., Wilson, A. M., Burrill, E. A., Turner, J. A., Pugh, S. A., Christiansen, G., Ridley, T., Menlove, J.: The Forest Inventory and Analysis Database: Database description and user guide version 7.0 for Phase 2. U.S. Department of Agriculture, Forest Service, 830 pp., available at: <http://www.fia.fs.fed.us/library/database-documentation/>, last access: 27 April 2017, 2017.

Radke, L.: Particulate and trace gas emissions from large biomass fires in North America, in *Global Biomass Burning: Atmospheric, Climatic and Biospheric Implications*, pp. 209–224, MIT Press, Cambridge, MA, 1991.

Rogerson, T.: Estimating foliage on loblolly pine, Res. Note SO-16, New Orleans, LA, 1964.

Scott, J. H. and Reinhardt, E. D.: Assessing crown fire potential by linking models of surface and crown fire behavior, Res. Pap. RMRS-RP-29, U.S. Department of Agriculture, Forest Service, Rocky Mountain Research Station, Fort Collins, Colorado, 59 pp., available at: <https://www.treearch.fs.fed.us/pubs/4623>, last access: 27 April 2017, 2001.

Urbanski, S.: Wildland fire emissions, carbon, and climate: Emission factors, *Forest Ecology and Management*, 317, 51-60, doi:10.1016/j.foreco.2013.05.045, 2014.

Urbanski, S. P., Hao, W. M. and Baker, S.: Chemical Composition of Wildland Fire Emissions, in *Wildland Fires and Air Pollution*, vol. Volume 8, pp. 79–107, Elsevier. [online] Available from: <https://www.treearch.fs.fed.us/pubs/33764>, last access: 9 May 2017, 2009.

Yokelson, R. J., Goode, J., Ward, D., Susott, R., Babbitt, R., Wade, D., Bertschi, I., Griffith, D. and Hao, W.: Emissions of formaldehyde, acetic acid, methanol, and other trace gases from biomass fires in North Carolina measured by airborne Fourier transform infrared spectroscopy RIDC-9971-2011, *J. Geophys. Res.-Atmos.*, 104(D23), 30109–30125, doi:10.1029/1999JD900817, 1999.

## Figure Captions

Figure S1. Plots of CO<sub>2</sub>, CO, CH<sub>4</sub>, and PM<sub>2.5</sub> EF versus MCE for forest fires listed in Table S4. Solid lines are linear least squares regression fits.

Figure S2. Plots of CO<sub>2</sub>, CO, CH<sub>4</sub>, and PM<sub>2.5</sub> EF versus MCE for rangeland fires listed in Table S4. Solid lines are linear least squares regression fits.



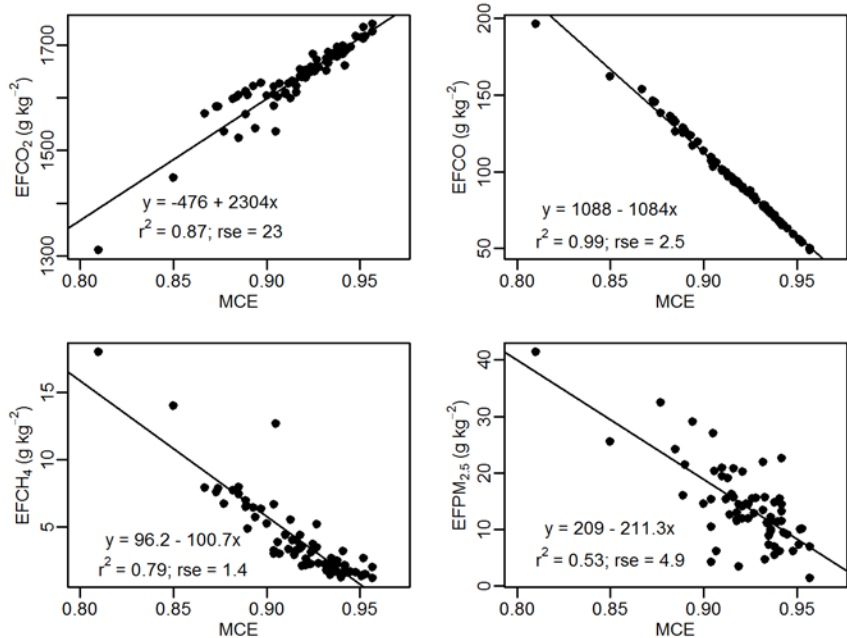

Figure S1. Plots of CO<sub>2</sub>, CO, CH<sub>4</sub>, and PM<sub>2.5</sub> EF versus MCE for forest fires listed in Table S4. Solid lines are linear least squares regression fits.

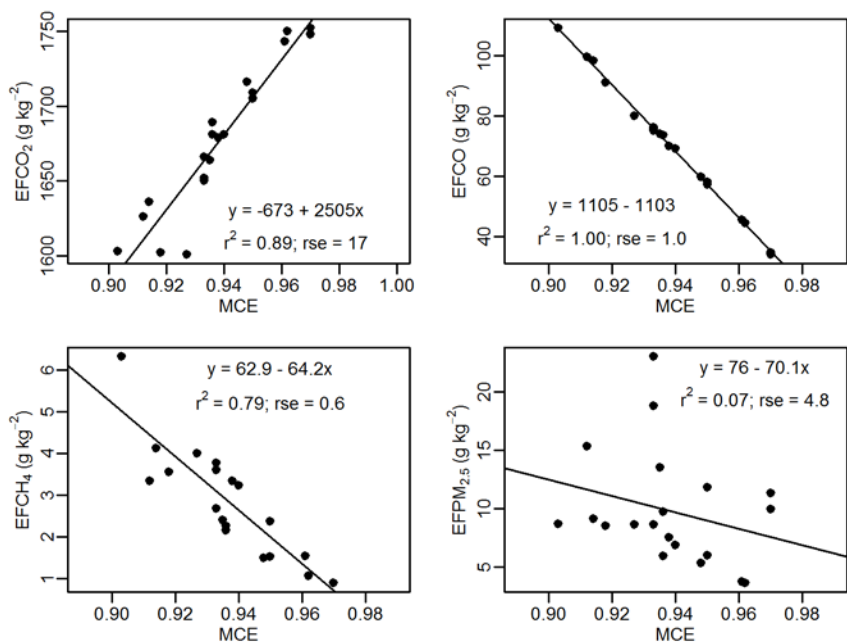

Figure S2. Plots of CO<sub>2</sub>, CO, CH<sub>4</sub>, and PM<sub>2.5</sub> EF versus MCE for rangeland fires listed in Table S4. Solid lines are linear least squares regression fits.
