# Supplementary material for: Contiguous United States wildland fire emission estimates during 2003–2015
Source: Copernicus journal article supplement (doi:10.5194/essd-2018-100), 2018-08-31
Supplement: Supplementary file [file essd-2018-100-AC2-supplement.pdf]

Table 11. Statistics for comparison of annual fuel consumption by region between MFLEI and FINN v1.5, GFED v4.1s, and WFEIS v0.5. Regions are as defined in Fig. 14a.

|                                     | Region |       |       |      |       |       |       |
|-------------------------------------|--------|-------|-------|------|-------|-------|-------|
|                                     | CONUS  | NW    | CA    | SW   | NO    | SC    | SE    |
| MFLEI versus FINN v1.5 (2003–2015)  |        |       |       |      |       |       |       |
| Mean                                |        |       |       |      |       |       |       |
| RD <sup>a</sup>                     | -17%   | 6%    | 50%   | 103% | -35%  | -65%  | -75%  |
| Min RD                              | -71%   | -94%  | -25%  | 61%  | -103% | -131% | -135% |
| Max RD                              | 41%    | 81%   | 115%  | 131% | 68%   | 21%   | -31%  |
| r <sup>b</sup>                      | 0.62   | 0.90  | 0.87  | 0.92 | 0.57  | 0.24  | 0.70  |
| MFLEI versus GFED 4.1s (2003–2015)  |        |       |       |      |       |       |       |
| Mean RD                             | 29%    | 14%   | 3%    | 75%  | 16%   | 35%   | 43%   |
| Min RD                              | 0%     | -4%   | -27%  | 41%  | -83%  | -45%  | -1%   |
| Max RD                              | 60%    | 40%   | 52%   | 105% | 90%   | 91%   | 76%   |
| r                                   | 0.90   | 0.97  | 0.96  | 0.97 | 0.62  | 0.79  | 0.76  |
| MFLEI versus WFEIS v0.5 (2003–2013) |        |       |       |      |       |       |       |
| Mean RD                             | -2%    | 30%   | -26%  | 130% | -99%  | -51%  | 40%   |
| Min RD                              | -41%   | -110% | -177% | 35%  | -161% | -175% | -104% |
| Max RD                              | 56%    | 137%  | 112%  | 196% | -17%  | 121%  | 181%  |
| r                                   | 0.95   | 0.43  | -0.20 | 0.88 | 0.20  | -0.34 | 0.06  |

<sup>a</sup>

$$RD = 100 \times \frac{X(t)_{MFLEI} - Y(t)_i}{0.5 * (X(t)_{MFLEI} + Y(t)_i)}$$

$X(t)_{MFLEI}$  = MFLEI fuel consumed in year = t

$Y(t)_i$  = i fuel consumed in year = t, where i = FINN, GFED, or WFEIS

<sup>b</sup>r = correlation coefficient

Table 12. Statistics for comparison of annual PM<sub>2.5</sub> emitted consumption by region between MFLEI and FINN v1.5, GFED v4.1s, and WFEIS v0.5. Regions are as defined in Fig. 14a.

|                                     | Region |      |       |      |       |       |       |
|-------------------------------------|--------|------|-------|------|-------|-------|-------|
|                                     | CONUS  | NW   | CA    | SW   | NO    | SC    | SE    |
| MFLEI versus FINN v1.5 (2003–2015)  |        |      |       |      |       |       |       |
| Mean                                |        |      |       |      |       |       |       |
| RD <sup>a</sup>                     | 98%    | 56%  | 85%   | 136% | 24%   | -55%  | -70%  |
| Min RD                              | -70%   | -43% | 15%   | -55% | -44%  | -123% | -136% |
| Max RD                              | 86%    | 123% | 147%  | 157% | 125%  | 35%   | -27%  |
| r <sup>b</sup>                      | 0.61   | 0.90 | 0.88  | 0.94 | 0.52  | 0.20  | 0.71  |
| MFLEI versus GFED 4.1s (2003–2015)  |        |      |       |      |       |       |       |
| Mean RD                             | 76%    | 76%  | 61%   | 137% | 71%   | 59%   | 60%   |
| Min RD                              | 50%    | 58%  | 29%   | 104% | -24%  | -29%  | 18%   |
| Max RD                              | 99%    | 98%  | 106%  | 158% | 136%  | 119%  | 94%   |
| r                                   | 0.94   | 0.97 | 0.98  | 0.97 | 0.65  | 0.70  | 0.73  |
| MFLEI versus WFEIS v0.5 (2003–2013) |        |      |       |      |       |       |       |
| Mean RD                             | 49%    | 98%  | 96%   | 151% | 66%   | 103%  | 82%   |
| Min RD                              | 19%    | -59% | -154% | 63%  | -118% | -174% | -86%  |
| Max RD                              | 104%   | 167% | 161%  | 198% | 59%   | 122%  | 183%  |
| r                                   | 0.98   | 0.42 | -0.15 | 0.90 | 0.23  | -0.33 | 0.11  |

<sup>a</sup>

$$RD = 100 \times \frac{X(t)_{MFLEI} - Y(t)_i}{0.5 * (X(t)_{MFLEI} + Y(t)_i)}$$

$X(t)_{MFLEI}$  = MFLEI PM<sub>2.5</sub> emitted in year = t

$Y(t)_i$  = i PM<sub>2.5</sub> emitted in year = t, where i = FINN, GFED, or WFEIS

<sup>b</sup>r = correlation coefficient
